# Supplementary material for: High temperature low vacuum synthesis of a freestanding three-dimensional graphene nano-ribbon foam electrode
Source: Royal Society of Chemistry journal article supplement (doi:10.1039/c5ta08561f), 2016-01-01

**Electronic Supplementary Information (ESI)**

**High temperature low vacuum synthesis of a freestanding  
three-dimensional graphene nano-ribbon foam electrode**

Dale A. C. Brownson, Luiz C. S. Figueiredo-Filho,<sup>1,2</sup> Bill L. Riehl,<sup>3</sup> Bonnie D. Riehl,<sup>3</sup>  
Maria Gómez-Mingot,<sup>4</sup> Jesús Iniesta,<sup>4</sup> Orlando Fatibello-Filho<sup>1</sup> and Craig E. Banks\*

*Faculty of Science and Engineering, School of Science and the Environment,  
Division of Chemistry and Environmental Science, Manchester Metropolitan University,  
Chester Street, Manchester, M1 5GD, UK.*

<sup>1</sup>: *Departamento de Química, Universidade Federal de São Carlos,  
São Carlos - SP, Brazil, P.O. Box 676, 13560-970.*

<sup>2</sup>: *Campus Paranavaí, Instituto Federal do Paraná, 87703-536, Paranavaí, PR, Brazil.*

<sup>3</sup>: *SCNTE LTD., P.O. Box 38, Alpha, OH 45301, USA.*

<sup>4</sup>: *Physical Chemistry Department and Institute of Electrochemistry, University of Alicante,  
03690, San Vicente del Raspeig, Alicante, Spain.*

\*To whom correspondence should be addressed.

Email: [c.banks@mmu.ac.uk](mailto:c.banks@mmu.ac.uk); Tel: ++(0)1612471196; Fax: ++(0)1612476831

Website: [www.craigbanksresearch.com](http://www.craigbanksresearch.com)

### Figure S1

XPS spectra of the freestanding 3D GNR foam electrode. Overall spectrum (A) and de-convoluted C1s (B) and O1s (C) regions.

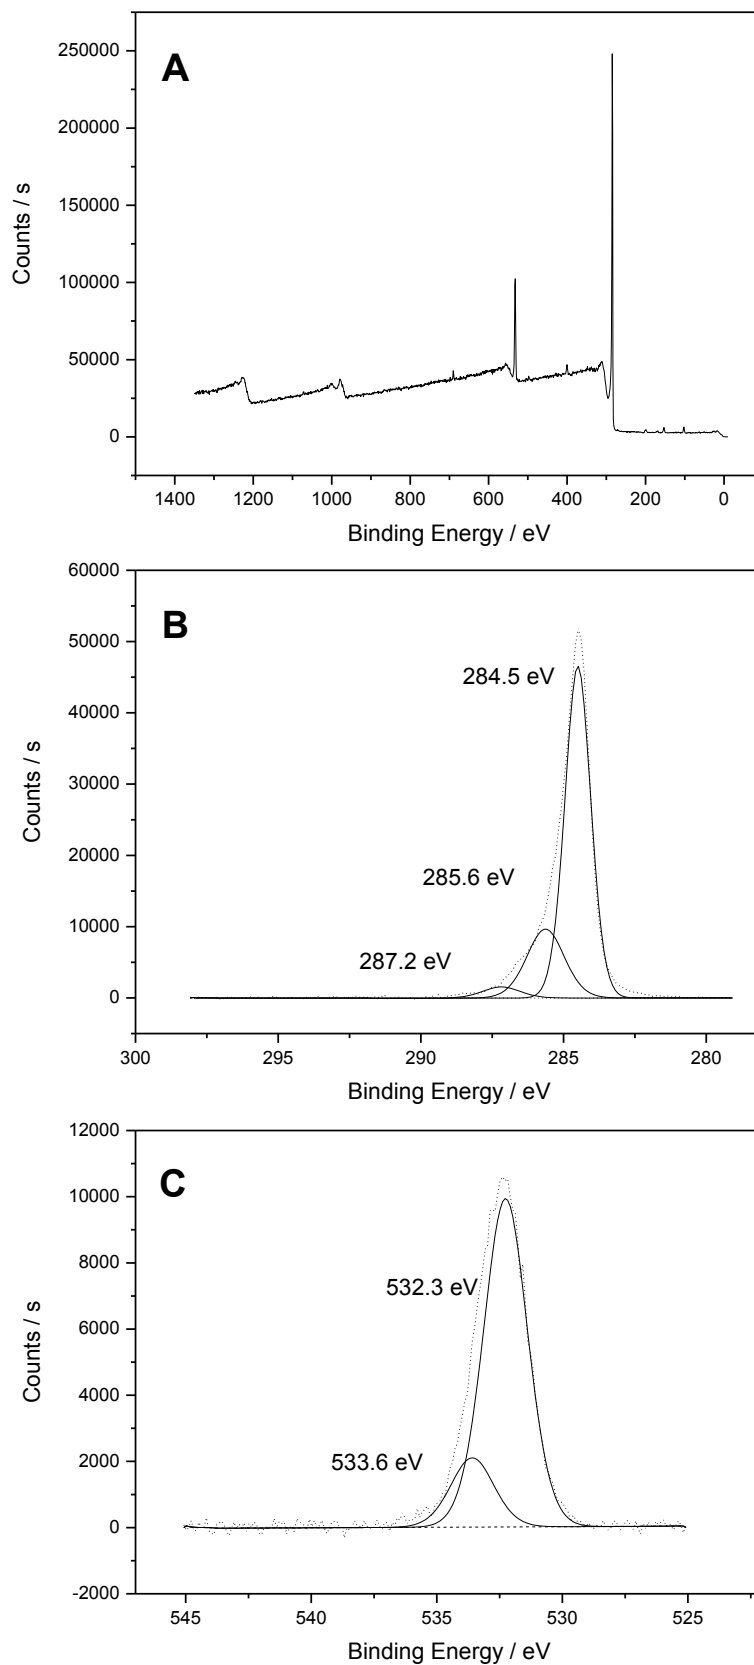

Supplement: c5ta08561f1.pdf [file c5ta08561f1.pdf]
